# Supplementary material
Source: MDPI journal article supplement (https://www.mdpi.com/2073-4344/12/4/382)
Supplement: s1 [file s1]

# Dispersion and Stabilization of Supported Layered Double Hydroxide-based Nanocomposites on V-based Catalysts for Nonoxidative Dehydrogenation of Isobutane to Isobutene

Fanji Liu<sup>1</sup>, Mingxun Han<sup>1</sup>, Xiangxiang Li<sup>1</sup>, Xiqing Zhang<sup>1</sup>, Yanting Wang<sup>1</sup>,

Yanhong Xu<sup>2</sup>, Lihong Zhang<sup>1,\*</sup>

*1 Department of Catalysis Science and Technology and Tianjin Key Laboratory of Applied Catalysis Science & Technology, School of Chemical Engineering and Technology, Tianjin University, Tianjin 300350, P.R. China*

*2 School of Chemical & Environmental Engineering, Pingdingshan University, Henan Province, Pingdingshan 467000, P.R. China*

*\*Corresponding authors: zlh\_224@163.com (Lihong Zhang)*

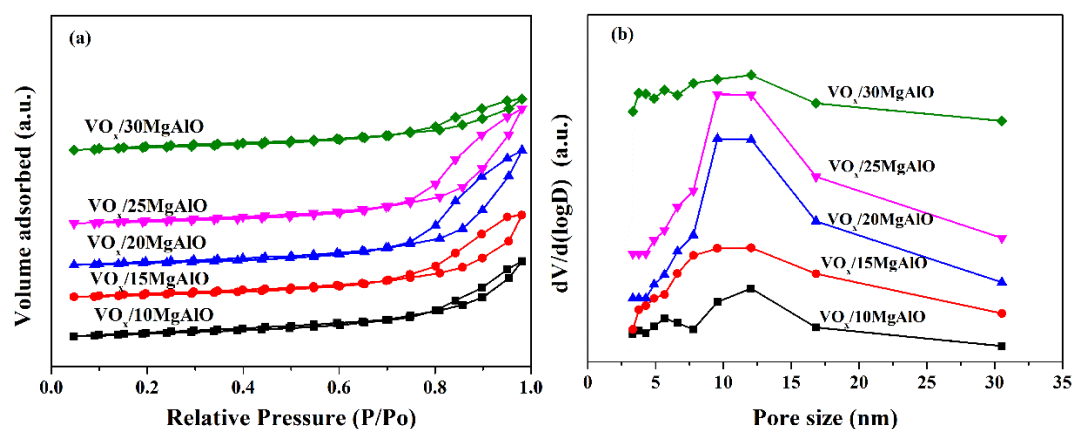

**Figure S1.** Low temperature N<sub>2</sub> adsorption-desorption isotherms (a) and pore size distribution curves (b) of the calcined catalysts VO<sub>x</sub>/mMgAlO (m = 10, 15, 20, 25, 30).

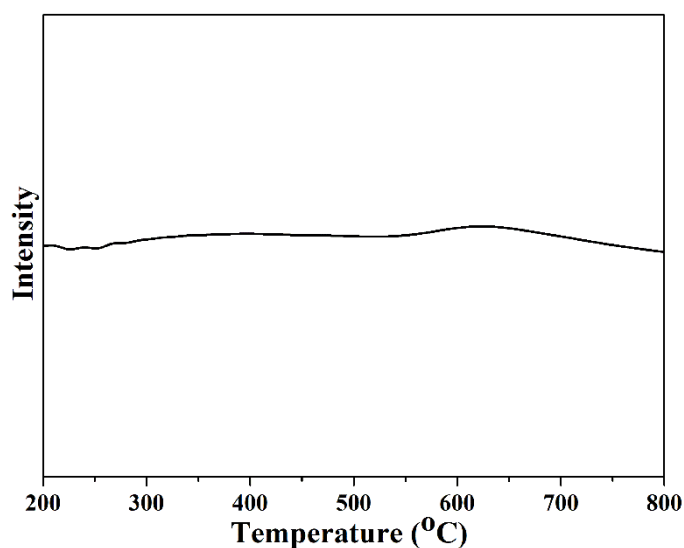

**Figure S2.** Temperature-programmed reduction (H<sub>2</sub>-TPR) profiles for the bare support

**Table S1.** TPR data of the calcined catalysts VO<sub>x</sub>/mMgAlO (m = 10, 15, 20, 25, 30).

| Catalysts                | Peak temperature (°C) | Peak area (%) | Hydrogen consumed (mmol <sup>3</sup> /g) | Average oxidation state of vanadium |
|--------------------------|-----------------------|---------------|------------------------------------------|-------------------------------------|
| VO <sub>x</sub> /10MgAlO | 460                   | 27            | 0.16                                     | 4.67                                |
|                          | 526                   | 69            | 0.41                                     | 3.82                                |
|                          | 612                   | 3             | 0.02                                     | 3.78                                |
| VO <sub>x</sub> /15MgAlO | 465                   | 30            | 0.17                                     | 4.66                                |
|                          | 535                   | 67            | 0.38                                     | 3.90                                |
|                          | 624                   | 3             | 0.02                                     | 3.86                                |
| VO <sub>x</sub> /20MgAlO | 490                   | 35            | 0.17                                     | 4.62                                |
|                          | 554                   | 62            | 0.33                                     | 3.95                                |
|                          | 623                   | 3             | 0.02                                     | 3.92                                |
| VO <sub>x</sub> /25MgAlO | 490                   | 35            | 0.16                                     | 4.63                                |
|                          | 554                   | 62            | 0.32                                     | 3.98                                |
|                          | 629                   | 3             | 0.02                                     | 3.95                                |
| VO <sub>x</sub> /30MgAlO | 492                   | 32            | 0.16                                     | 4.67                                |
|                          | 552                   | 66            | 0.32                                     | 4.01                                |
|                          | 625                   | 2             | 0.01                                     | 3.99                                |
